# Supplementary material for: Core–shell catalysts consisting of nanoporous cores for oxygen reduction reaction
Source: Royal Society of Chemistry journal article supplement (doi:10.1039/c3cp52252k), 2013-01-01
Supplement: c3cp52252k.pdf [file c3cp52252k.pdf]

# Supporting Information for

## Core-Shell Catalysts Consisting of Nanoporous Cores for Oxygen Reduction Reaction

*Minhua Shao,<sup>1,\*</sup> Brandon H. Smith,<sup>1,†</sup> Sandra Guerrero,<sup>1</sup> Lesia Protsailo,<sup>1</sup> Dong Su,<sup>2</sup> Keiichi Kaneko,<sup>3</sup> Jonathan H. Odell,<sup>1</sup> Michael P. Humbert,<sup>1,‡</sup> Kotaro Sasaki,<sup>4</sup> Jesse Marzullo,<sup>1</sup> Robert M. Darling<sup>1,‡</sup>*

<sup>1</sup>UTC Power, 195 Governor's Highway, South Windsor, CT 06074, United States

<sup>2</sup>Center for Functional Nanomaterials, Brookhaven National Laboratory, Upton, NY 11973, United States

<sup>3</sup>Toyota Motor Engineering & Manufacturing North America Inc., Ann Arbor, Michigan 48105 United States

<sup>4</sup>Chemistry Department, Brookhaven National Laboratory, Upton, NY 11973, United States

<sup>†</sup>Current address: The Pennsylvania State University, University Park, Pennsylvania, 16802, United States

<sup>‡</sup>Current address: United Technologies Research Center, East Hartford, CT 06108, United States

\*Minhua@gmail.com

Tel: (+1) 860-727-7251

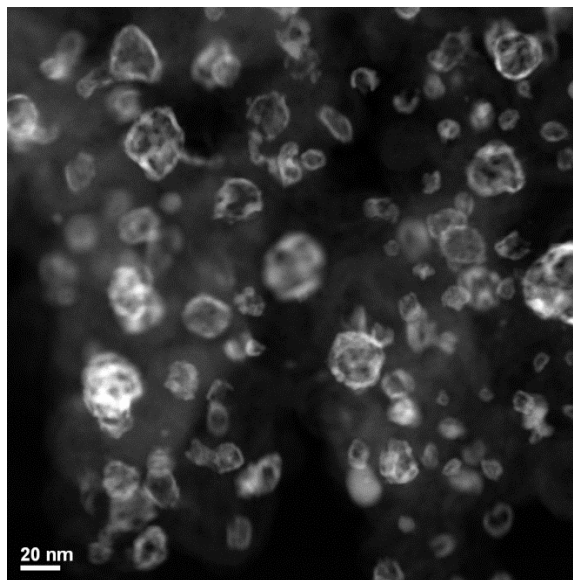

Figure S1. HAADF-STEM images of dealloyed Pd-Ni/C (d-PdNi/C) with a nanoporous structure.

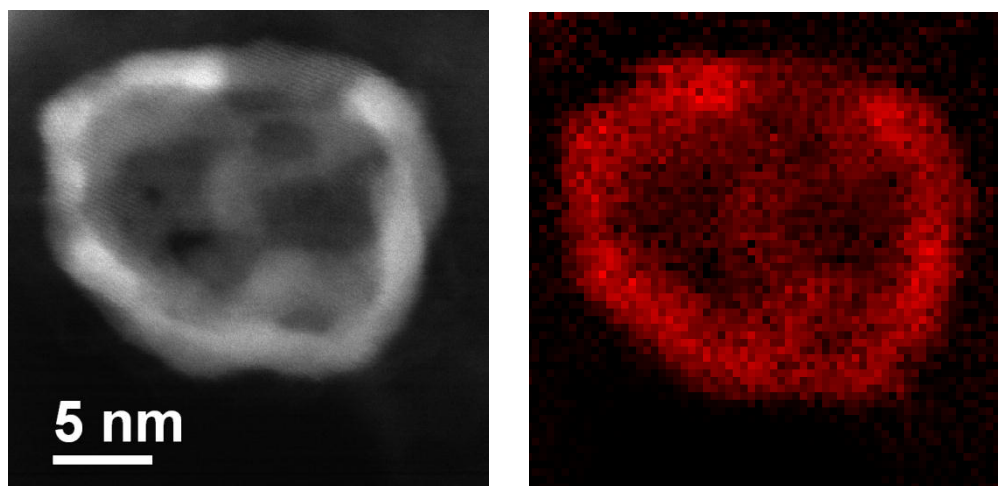

Figure S2. A single d-PdNi particle in sample 3: HAADF-STEM image (A) and 2D EELS mapping (B).

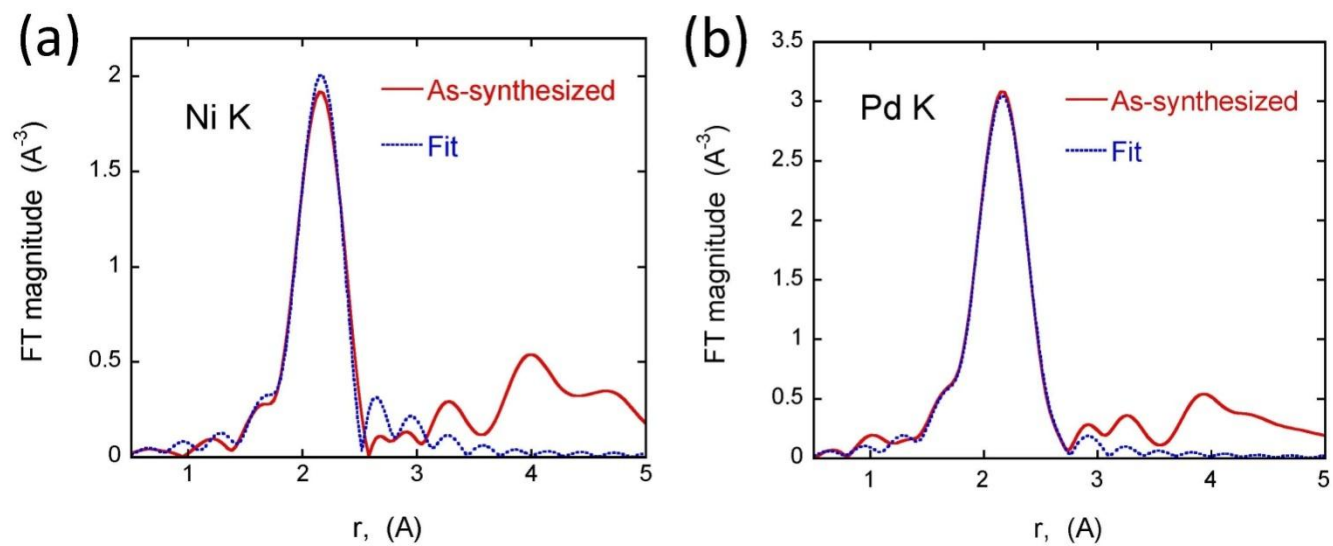

Figure S3. Fourier transformed EXAFS of the data (red) and first-shell fit (dotted blue) of (a) Ni K and (b) Pd K edges from the as-synthesized sample.

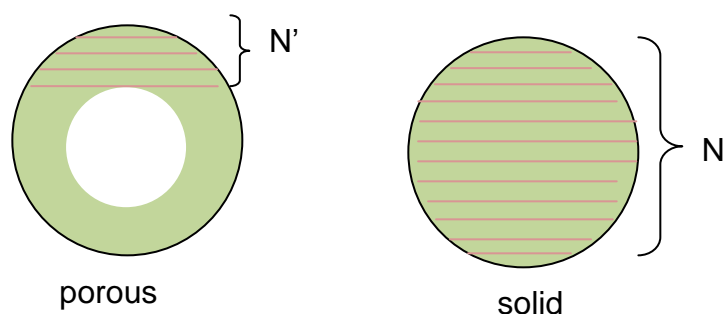

The number of repeated cell unites  $N > N'$

Figure S4. Illustrations of porous and solid particles. The intensity (reverse of broadness) of a XRD peak depends on the number of repeated cell units ( $N$ ) in one direction ( $a$ ) in the crystal (p.6 in [prism.mit.edu/xray/CrystalSizeAnalysis.ppt](http://prism.mit.edu/xray/CrystalSizeAnalysis.ppt)):

$$I = I_e F^2 \frac{\sin^2(\pi/\lambda)(s-s_o) \bullet N_1 a_1}{\sin^2(\pi/\lambda)(s-s_o) \bullet a_1} \frac{\sin^2(\pi/\lambda)(s-s_o) \bullet N_2 a_2}{\sin^2(\pi/\lambda)(s-s_o) \bullet a_2} \frac{\sin^2(\pi/\lambda)(s-s_o) \bullet N_3 a_3}{\sin^2(\pi/\lambda)(s-s_o) \bullet a_3}$$

The larger the number  $N$ , the higher the intensity (narrower of the XRD peak). For a porous particle, the number of the repeated unit cells ( $N'$ ) is smaller than that a solid particle with a similar overall particle size, resulting in a smaller crystallite size using Scherrer equation.

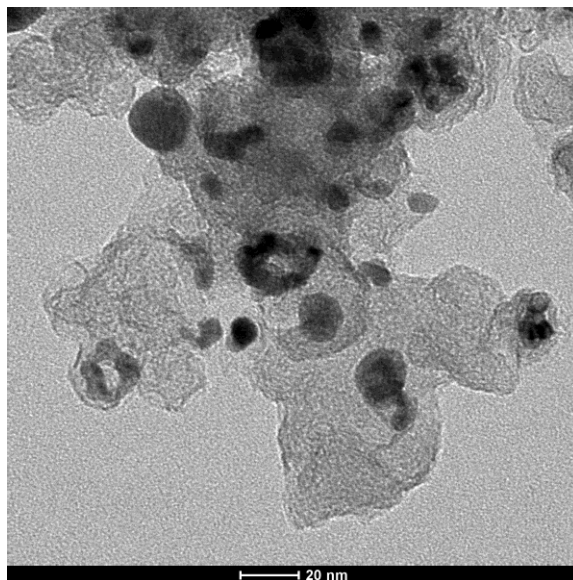

Figure S5. TEM image of sample 3 after first stage of dealloying in 1 M  $\text{HNO}_3$  at  $60^\circ\text{C}$  for 1 hr. Porous structure was seen in some of the particles.
